# Supplementary material
Source: MDPI journal article supplement (https://www.mdpi.com/2311-5637/10/2/98)
Supplement: s1 [file s1]

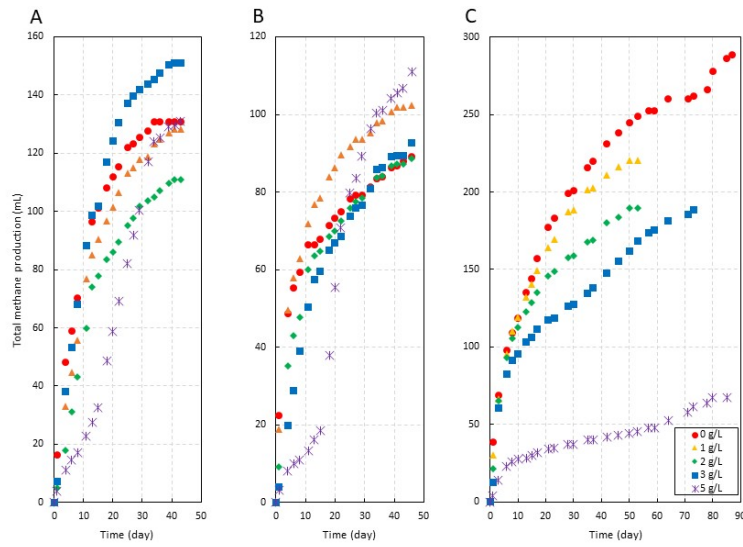

**Figure S1.** Methane production in anaerobic digestion with  $\text{NH}_4\text{-N}$  (0, 1, 2, 3, and 5 g/L) by sludge A, B, and C used for acclimation.

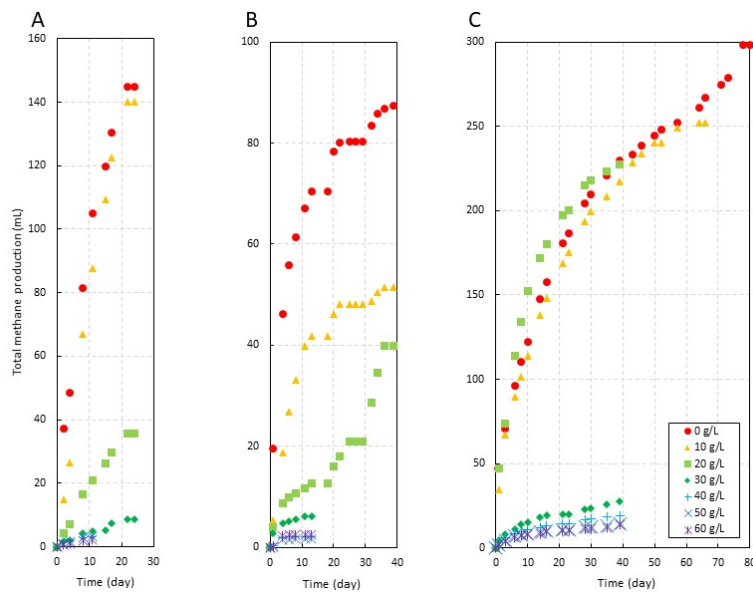

**Figure S2.** Methane production in anaerobic digestion with sodium chloride (0, 10, 20, 30, 40, 50, and 60 g/L) by sludge A, B, and C used for acclimation.
